# Supplementary material for: Effects of Different Low-Temperature Storage Methods on the Quality and Processing Characteristics of Fresh Beef
Source: MDPI journal article supplement (doi:10.3390/foods12040782), 2023-02-11
Supplement: s1 [file s1]

Supporting information for:

**Effects of different low-temperature storages on the quality and processing characteristics of fresh beef**

**Ruiqi Cao<sup>1</sup>, Lixiu Yan<sup>2</sup>, Shujian Xiao<sup>1</sup>, Bo Hou<sup>1</sup>, Xingchen Zhou<sup>1</sup>, Wei Wang<sup>1</sup>, Ting Bai<sup>1</sup>, Kaixian Zhu<sup>3</sup>, Jie Cheng<sup>1,\*</sup>, Jiamin Zhang<sup>1</sup>**

<sup>1</sup> Meat Processing Key Laboratory of Sichuan Province, College of Food and Biological Engineering, Chengdu University, Chengdu 610106, P. R. China

<sup>2</sup> Chongqing Academy of Metrology and Quality Inspection, Chongqing, 401123, P. R. China

<sup>3</sup> Cuisine Science Key Laboratory of Sichuan Province, Sichuan Tourism University, Chengdu 610100, P. R. China

\* Corresponding author:

E-mail address: chengjie@cdu.edu.cn (J.C.)

Meat Processing Key Laboratory of Sichuan Province, College of Food and Biological Engineering, Chengdu University, Chengdu 610106, P. R. China.

**Supplementary Table S1. Changes in moisture content of raw beef under different low-temperature storage methods**

| Time | Moisture content           |                              |                             |                             |
|------|----------------------------|------------------------------|-----------------------------|-----------------------------|
|      | Refrigeration              | Frozen                       | Micro-freezing              | Ice temperature             |
| 0 d  | 68.12%±1.04% <sup>a</sup>  | 68.12%±1.04% <sup>a</sup>    | 68.12%±1.04% <sup>a</sup>   | 68.12%±1.04% <sup>ax</sup>  |
| 2 d  | 65.19%±1.25% <sup>ax</sup> | 66.54%±0.61% <sup>abx</sup>  | 66.90%±1.58% <sup>abx</sup> | 66.47%±1.31% <sup>abx</sup> |
| 4 d  | 66.66%±2.31% <sup>ax</sup> | 65.47%±2.25% <sup>abcx</sup> | 65.32%±1.96% <sup>bcx</sup> | 66.46%±0.79% <sup>abx</sup> |
| 6 d  | 64.70%±2.37% <sup>ax</sup> | 64.72%±0.45% <sup>bcdx</sup> | 64.61%±0.77% <sup>bcx</sup> | 64.92%±0.52% <sup>bx</sup>  |
| 8 d  | -                          | 64.67%±1.66% <sup>bcdx</sup> | 63.30%±1.01% <sup>cdx</sup> | 64.45%±1.50% <sup>bx</sup>  |
| 10 d | -                          | 61.56%±0.83% <sup>ex</sup>   | 61.88%±1.66% <sup>dex</sup> | 61.74%±0.62% <sup>cx</sup>  |
| 12 d | -                          | 62.07%±1.37% <sup>dex</sup>  | 61.60%±0.73% <sup>dex</sup> | 60.56%±0.62% <sup>cx</sup>  |
| 15 d | -                          | 63.67%±0.49% <sup>cdex</sup> | 60.49%±0.66% <sup>ex</sup>  | -                           |
| 18 d | -                          | 58.33%±1.31% <sup>fx</sup>   | 60.64%±0.57% <sup>ex</sup>  | -                           |

**Supplementary Table S2. Changes of relative content of free amino acids in beef storage with different low-temperature storage methods (%).**

| Amino acid | Refrigeration |       | Frozen |       |       |       | Micro-freezing |       |       |       | Ice temperature |       |       |
|------------|---------------|-------|--------|-------|-------|-------|----------------|-------|-------|-------|-----------------|-------|-------|
|            | 0 d           | 6 d   | 0 d    | 6 d   | 12 d  | 18 d  | 0 d            | 6 d   | 12 d  | 18 d  | 0 d             | 6 d   | 12 d  |
| Asp        | 3.04          | 2.93  | 3.04   | 3.19  | 2.73  | 3.40  | 3.04           | 3.19  | 2.90  | 3.17  | 3.04            | 2.82  | 2.72  |
| Glu        | 4.88          | 6.05  | 4.88   | 6.54  | 5.76  | 7.06  | 4.88           | 6.52  | 6.10  | 6.78  | 4.88            | 6.23  | 5.67  |
| Ser        | 3.80          | 4.43  | 3.80   | 4.24  | 4.43  | 3.93  | 3.80           | 4.06  | 4.13  | 3.92  | 3.80            | 3.95  | 4.25  |
| Gly        | 6.07          | 5.57  | 6.07   | 6.03  | 5.79  | 6.39  | 6.07           | 5.63  | 6.09  | 5.96  | 6.07            | 5.54  | 5.23  |
| His        | 6.72          | 5.81  | 6.72   | 5.47  | 6.32  | 5.95  | 6.72           | 5.32  | 5.59  | 5.45  | 6.72            | 6.55  | 6.21  |
| Arg        | 6.72          | 6.89  | 6.72   | 7.09  | 6.60  | 6.45  | 6.72           | 6.74  | 6.15  | 6.67  | 6.72            | 6.38  | 6.28  |
| Thr        | 7.59          | 8.59  | 7.59   | 8.27  | 8.36  | 7.95  | 7.59           | 7.88  | 8.37  | 8.01  | 7.59            | 8.28  | 8.00  |
| Ala        | 4.12          | 3.52  | 4.12   | 3.98  | 3.80  | 4.33  | 4.12           | 3.96  | 3.87  | 4.12  | 4.12            | 3.84  | 3.71  |
| Pro        | 11.06         | 11.39 | 11.06  | 11.23 | 10.63 | 9.95  | 11.06          | 10.41 | 11.95 | 10.55 | 11.06           | 10.50 | 10.35 |
| Tyr        | 7.05          | 7.80  | 7.05   | 7.28  | 7.87  | 6.65  | 7.05           | 7.37  | 7.76  | 7.18  | 7.05            | 7.49  | 8.20  |
| Val        | 5.42          | 5.22  | 5.42   | 5.34  | 5.24  | 5.58  | 5.42           | 5.75  | 5.08  | 5.58  | 5.42            | 5.36  | 5.50  |
| Met        | 5.10          | 5.16  | 5.10   | 4.61  | 5.35  | 4.36  | 5.10           | 5.22  | 4.71  | 4.63  | 5.10            | 5.48  | 6.07  |
| Ile        | 5.42          | 5.55  | 5.42   | 5.60  | 5.31  | 5.93  | 5.42           | 5.63  | 5.45  | 5.96  | 5.42            | 5.32  | 5.41  |
| Leu        | 9.76          | 9.65  | 9.76   | 9.75  | 9.81  | 10.37 | 9.76           | 9.98  | 10.02 | 10.25 | 9.76            | 9.60  | 9.80  |
| Phe        | 10.30         | 10.16 | 10.30  | 9.50  | 9.86  | 8.60  | 10.30          | 9.50  | 9.98  | 8.92  | 10.30           | 9.96  | 10.01 |
| Lys        | 2.93          | 1.27  | 2.93   | 1.89  | 2.15  | 3.10  | 2.93           | 2.82  | 1.84  | 2.84  | 2.93            | 2.69  | 2.59  |

**Supplementary Table S3. Changes in absolute content of essential amino acids during storage of beef with different low-temperature storage methods (g/100g) .**

| Amino acid | Fresh | Refrigeration 6 d | Frozen 6 d | Micro-freezing 6 d | Ice temperature 6d | Frozen 12 d | Micro-freezing 12 d | Ice temperature 12 d | Frozen 18 d | Micro-freezing 18 d |
|------------|-------|-------------------|------------|--------------------|--------------------|-------------|---------------------|----------------------|-------------|---------------------|
| Thr        | 0.70  | 0.64              | 0.71       | 0.67               | 0.79               | 0.70        | 0.69                | 0.76                 | 0.70        | 0.70                |
| Val        | 0.50  | 0.39              | 0.46       | 0.49               | 0.51               | 0.44        | 0.42                | 0.52                 | 0.49        | 0.49                |
| Met        | 0.47  | 0.39              | 0.39       | 0.44               | 0.52               | 0.45        | 0.39                | 0.57                 | 0.38        | 0.40                |
| Ile        | 0.50  | 0.41              | 0.48       | 0.48               | 0.51               | 0.45        | 0.45                | 0.51                 | 0.52        | 0.52                |
| Leu        | 0.90  | 0.72              | 0.84       | 0.84               | 0.91               | 0.83        | 0.83                | 0.93                 | 0.91        | 0.90                |
| Phe        | 0.95  | 0.76              | 0.81       | 0.80               | 0.95               | 0.83        | 0.83                | 0.95                 | 0.75        | 0.78                |
| Lys        | 0.27  | 0.09              | 0.16       | 0.24               | 0.26               | 0.18        | 0.15                | 0.24                 | 0.27        | 0.25                |
| Total      | 4.29  | 3.41              | 3.85       | 3.95               | 4.44               | 3.88        | 3.77                | 4.48                 | 4.02        | 4.04                |

**Supplementary Table S4. Changes in texture of beef during storage with different low-temperature storage methods.**

| Time | Way             | Hardness (g)           | Hardness (g/s)            | The elastic             | Adhesiveness             | Chewiness (g.sec)      | Resilience               |
|------|-----------------|------------------------|---------------------------|-------------------------|--------------------------|------------------------|--------------------------|
| 0 d  | Refrigeration   | 4374±367 <sup>c</sup>  | -0.70±0.14 <sup>a</sup>   | 0.52±0.01 <sup>a</sup>  | 0.51±0.06 <sup>a</sup>   | 1827±74.7 <sup>d</sup> | 0.20±0.02 <sup>a</sup>   |
|      | Ice temperature | 4374±367 <sup>c</sup>  | -0.70±0.14a <sup>b</sup>  | 0.52±0.01 <sup>a</sup>  | 0.51±0.06 <sup>a</sup>   | 1827±74.7 <sup>c</sup> | 0.20±0.02 <sup>ab</sup>  |
|      | Micro-freezing  | 4374±367 <sup>c</sup>  | -0.70±0.14 <sup>abc</sup> | 0.52±0.01 <sup>a</sup>  | 0.51±0.05 <sup>a</sup>   | 1827±74.7 <sup>e</sup> | 0.20±0.02 <sup>abc</sup> |
|      | Frozen          | 4374±367 <sup>c</sup>  | -0.70±0.14 <sup>a</sup>   | 0.52±0.01 <sup>ab</sup> | 0.51±0.06 <sup>a</sup>   | 1827±74.7 <sup>c</sup> | 0.2±0.02 <sup>abc</sup>  |
| 2 d  | Refrigeration   | 3457±95 <sup>b</sup>   | -0.59±0.37 <sup>a</sup>   | 0.51±0.01 <sup>a</sup>  | 0.58±0.06 <sup>a</sup>   | 1601±220 <sup>c</sup>  | 0.21±0.02 <sup>a</sup>   |
|      | Ice temperature | 3626±288 <sup>d</sup>  | -0.68±0.11 <sup>abc</sup> | 0.56±0.13 <sup>ab</sup> | 0.62±0.08 <sup>b</sup>   | 1250±319 <sup>b</sup>  | 0.24±0.05 <sup>bc</sup>  |
|      | Micro-freezing  | 4183±243 <sup>d</sup>  | -1.04±0.59 <sup>a</sup>   | 0.7±0.04 <sup>c</sup>   | 0.53±0.04 <sup>ab</sup>  | 1730±110 <sup>d</sup>  | 0.24±0.02 <sup>cd</sup>  |
|      | Frozen          | 4660±243 <sup>b</sup>  | -0.64±0.07 <sup>ab</sup>  | 0.65±0.01 <sup>c</sup>  | 0.63±0.01 <sup>b</sup>   | 1794±470 <sup>b</sup>  | 0.24±0.02 <sup>c</sup>   |
| 4 d  | Refrigeration   | 3107±200 <sup>b</sup>  | -0.43±0.05 <sup>a</sup>   | 0.52±0.05 <sup>a</sup>  | 0.56±0.07 <sup>a</sup>   | 1130±95.6 <sup>b</sup> | 0.22±0.01 <sup>a</sup>   |
|      | Ice temperature | 3421±115 <sup>cd</sup> | -0.78±0.17 <sup>a</sup>   | 0.58±0.05 <sup>ab</sup> | 0.57±0.02 <sup>ab</sup>  | 1031±350 <sup>ab</sup> | 0.20±0.01 <sup>ab</sup>  |
|      | Micro-freezing  | 3653±195 <sup>cd</sup> | -1.04±0.06 <sup>a</sup>   | 0.58±0.03 <sup>ab</sup> | 0.54±0.02 <sup>abc</sup> | 1477±108 <sup>c</sup>  | 0.20±0.03 <sup>ab</sup>  |
|      | Frozen          | 4604±230 <sup>b</sup>  | -0.63±0.04 <sup>ab</sup>  | 0.47±0.01 <sup>a</sup>  | 0.5±0.04 <sup>a</sup>    | 1551±222 <sup>b</sup>  | 0.18±0.02 <sup>a</sup>   |
| 6 d  | Refrigeration   | 2656±75 <sup>a</sup>   | -0.32±0.10 <sup>a</sup>   | 0.58±0.05 <sup>a</sup>  | 0.63±0.07 <sup>a</sup>   | 917±144 <sup>ab</sup>  | 0.25±0.04 <sup>a</sup>   |
|      | Ice temperature | 3078±127 <sup>bc</sup> | -0.50±0.08 <sup>c</sup>   | 0.64±0.01 <sup>ab</sup> | 0.61±0.04 <sup>b</sup>   | 988±59.2 <sup>ab</sup> | 0.25±0.03 <sup>c</sup>   |
|      | Micro-freezing  | 3239±366 <sup>bc</sup> | -0.81±0.08 <sup>ab</sup>  | 0.63±0.01 <sup>b</sup>  | 0.53±0.05 <sup>abc</sup> | 1395±124 <sup>c</sup>  | 0.24±0.01 <sup>bcd</sup> |

| Time | Way             | Hardness (g)            | Hardness (g/s)            | The elastic             | Adhesiveness              | Chewiness (g.sec)      | Resilience               |
|------|-----------------|-------------------------|---------------------------|-------------------------|---------------------------|------------------------|--------------------------|
|      | Frozen          | 4354±1103 <sup>b</sup>  | -0.63±0.05 <sup>ab</sup>  | 0.57±0.05 <sup>bc</sup> | 0.62±0.04 <sup>b</sup>    | 1105±70 <sup>a</sup>   | 0.25±0.02 <sup>c</sup>   |
| 8 d  | Ice temperature | 2814±329 <sup>b</sup>   | -0.51±0.03 <sup>bc</sup>  | 0.59±0.02 <sup>ab</sup> | 0.58±0.04 <sup>ab</sup>   | 985±146 <sup>ab</sup>  | 0.18±0.02 <sup>a</sup>   |
|      | Micro-freezing  | 3176±549 <sup>abc</sup> | -0.79±0.17 <sup>ab</sup>  | 0.62±0.04 <sup>b</sup>  | 0.56±0.04 <sup>abcd</sup> | 1094±34.9 <sup>b</sup> | 0.24±0.02 <sup>bcd</sup> |
|      | Frozen          | 3409±168 <sup>a</sup>   | -0.51±0.11 <sup>abc</sup> | 0.64±0.06 <sup>c</sup>  | 0.59±0.05 <sup>ab</sup>   | 966±47.3 <sup>a</sup>  | 0.23±0.04 <sup>bc</sup>  |
| 10 d | Ice temperature | 2729±217 <sup>ab</sup>  | -0.06±0.02 <sup>d</sup>   | 0.65±0.04 <sup>b</sup>  | 0.57±0.03 <sup>ab</sup>   | 946±167 <sup>ab</sup>  | 0.21±0.02 <sup>abc</sup> |
|      | Micro-freezing  | 3154±81 <sup>abc</sup>  | -0.45±0.32 <sup>bcd</sup> | 0.73±0.06 <sup>c</sup>  | 0.57±0.02 <sup>abcd</sup> | 918±12.1 <sup>a</sup>  | 0.25±0.03 <sup>d</sup>   |
|      | Frozen          | 3386±197 <sup>a</sup>   | -0.47±0.06 <sup>abc</sup> | 0.66±0.03 <sup>c</sup>  | 0.53±0.02 <sup>a</sup>    | 856±29.2 <sup>a</sup>  | 0.20±0.01 <sup>ab</sup>  |
| 12 d | Ice temperature | 2675±147 <sup>ab</sup>  | -0.04±0.01 <sup>d</sup>   | 0.55±0.05 <sup>ab</sup> | 0.53±0.03 <sup>ab</sup>   | 767±27.9 <sup>a</sup>  | 0.17±0.01 <sup>a</sup>   |
|      | Micro-freezing  | 2933±55 <sup>ab</sup>   | -0.35±0.12 <sup>bcd</sup> | 0.53±0.02 <sup>a</sup>  | 0.60±0.01 <sup>bcd</sup>  | 836±84 <sup>a</sup>    | 0.21±0.03 <sup>abc</sup> |
|      | Frozen          | 2879±173 <sup>a</sup>   | -0.44±0.23 <sup>abc</sup> | 0.57±0.02 <sup>bc</sup> | 0.5±0.02 <sup>a</sup>     | 799±165 <sup>a</sup>   | 0.16±0.00 <sup>a</sup>   |
| 15 d | Micro-freezing  | 2901±79 <sup>ab</sup>   | -0.23±0.12 <sup>cd</sup>  | 0.57±0.02 <sup>ab</sup> | 0.61±0.03 <sup>cd</sup>   | 835±47.3 <sup>a</sup>  | 0.20±0.02 <sup>ab</sup>  |
|      | Frozen          | 2739±133 <sup>a</sup>   | -0.38±0.28 <sup>bc</sup>  | 0.57±0.04 <sup>bc</sup> | 0.59±0.09 <sup>ab</sup>   | 796±21.3 <sup>a</sup>  | 0.23±0.04 <sup>bc</sup>  |
| 18 d | Micro-freezing  | 2630±417 <sup>a</sup>   | -0.18±0.02 <sup>d</sup>   | 0.62±0.00 <sup>b</sup>  | 0.63±0.04 <sup>d</sup>    | 804±64 <sup>a</sup>    | 0.19±0.02 <sup>a</sup>   |
|      | Frozen          | 2710±330 <sup>a</sup>   | -0.31±0.08 <sup>c</sup>   | 0.66±0.1 <sup>c</sup>   | 0.51±0.03 <sup>a</sup>    | 767±96.6 <sup>a</sup>  | 0.17±0.02 <sup>a</sup>   |

**Supplementary Table S5. Changes of shear force during storage of beef with different low-temperature storage methods.**

| Time | The shear stress (g)  |                        |                       |                         |
|------|-----------------------|------------------------|-----------------------|-------------------------|
|      | Refrigeration         | Ice temperature        | Micro-freezing        | Frozen                  |
| 0 d  | 7916±257 <sup>a</sup> | 7916±257 <sup>a</sup>  | 7916±257 <sup>a</sup> | 7916±257 <sup>a</sup>   |
| 2 d  | 7697±857 <sup>a</sup> | 7563±136 <sup>a</sup>  | 7487±53 <sup>ab</sup> | 7580±236 <sup>ab</sup>  |
| 4 d  | 6394±559 <sup>b</sup> | 7287±287 <sup>a</sup>  | 7312±94 <sup>b</sup>  | 7331±33 <sup>ab</sup>   |
| 6 d  | 5340±255 <sup>b</sup> | 6430±177 <sup>b</sup>  | 6736±369 <sup>c</sup> | 6803±1152 <sup>bc</sup> |
| 8 d  | -                     | 5729±541 <sup>bc</sup> | 6468±20 <sup>cd</sup> | 6280±275 <sup>cd</sup>  |
| 10 d | -                     | 5322±723 <sup>cd</sup> | 6268±279 <sup>c</sup> | 5753±367 <sup>d</sup>   |
| 12 d | -                     | 4797±501 <sup>d</sup>  | 5382±328 <sup>e</sup> | 5664±115 <sup>de</sup>  |
| 15 d | -                     | -                      | 4860±55 <sup>f</sup>  | 4779±209 <sup>ef</sup>  |
| 18 d | -                     | -                      | 4434±227 <sup>f</sup> | 4404±308 <sup>f</sup>   |

**Supplementary Table S6. Changes of Volatile Flavor Substances of Beef in Different Low-temperature Storage.**

| Numb<br>er | RT     | Name                 | Molecul<br>ar<br>formula                      | The absolute content |        |        |         |                |        |        |        |                 |        |        |         |        |
|------------|--------|----------------------|-----------------------------------------------|----------------------|--------|--------|---------|----------------|--------|--------|--------|-----------------|--------|--------|---------|--------|
|            |        |                      |                                               | Refrigeration        |        | Frozen |         | Micro-freezing |        |        |        | Ice temperature |        |        |         |        |
|            |        |                      |                                               | 0 d                  | 6 d    | 0 d    | 6 d     | 12 d           | 18 d   | 0 d    | 6 d    | 12 d            | 18 d   | 0 d    | 6 d     | 12 d   |
| 1          | 4.83   | N-hexaldehyde        | C <sub>6</sub> H <sub>12</sub> O              | 155.20               | -      | 155.20 | 522.89  | 40.17          | 179.46 | 155.20 | 478.19 | 279.4           | 13.10  | 155.20 | 668.33  | -      |
| 2          | 7.936  | Heptaldehyde         | C <sub>7</sub> H <sub>14</sub> O              | 40.77                | 12.59  | 40.77  | 90.15   | 13.09          | 55.37  | 40.77  | 67.11  | 77.43           | -      | 40.77  | 90.25   | -      |
| 3          | 10.075 | Benzaldehyde         | C <sub>7</sub> H <sub>6</sub> O               | 67.47                | 81.17  | 67.47  | 118     | 168.53         | 420.5  | 67.47  | 222.01 | 415.37          | 88.86  | 67.47  | 159.34  | 149.39 |
| 4          | 14.313 | Phenylacetaldehyde   | C <sub>8</sub> H <sub>8</sub> O               | -                    | 83.85  | -      | 82.29   | 25.91          | -      | -      | 23.38  | 38.08           | 97.46  | -      | -       | 44.83  |
| 5          | 17.67  | Nonanal              | C <sub>9</sub> H <sub>18</sub> O              | 109.34               | 55.01  | 109.34 | 214.24  | 74.46          | 341.44 | 109.34 | 204.66 | 163.58          | 69.97  | 109.34 | 240.52  | 119.45 |
| 6          | 39.003 | Pentadecanal         | C <sub>15</sub> H <sub>30</sub> O             | -                    | -      | -      | -       | -              | -      | -      | -      | -               | -      | -      | 17.36   | 61.77  |
| Total      |        | Aldehyde             |                                               | 372.78               | 232.61 | 372.78 | 1027.55 | 322.17         | 996.77 | 372.78 | 995.35 | 973.85          | 391.39 | 372.78 | 1175.81 | 375.44 |
| 7          | 7.604  | 2-Heptanone          | C <sub>7</sub> H <sub>14</sub> O              | -                    | 22.41  | -      | 15.76   | 34.39          | -      | -      | 52.24  | -               | -      | -      | 96.26   | -      |
| 8          | 17.07  | 2-Nonanone           | C <sub>9</sub> H <sub>18</sub> O              | -                    | -      | -      | 20.98   | 40.3           | -      | -      | -      | 26.01           | -      | -      | -       | -      |
| Total      |        | Ketone               | -                                             | 0.00                 | 22.41  | 0.00   | 36.74   | 74.69          | 0.00   | 0.00   | 52.24  | 26.01           | -      | 0.00   | 96.26   | 0.00   |
| 9          | 3.378  | Isoamyl alcohol      | C <sub>5</sub> H <sub>12</sub> O              | -                    | 402.01 | -      | -       | -              | -      | -      | -      | 357.27          | -      | -      | -       | -      |
| 10         | 4.41   | (R,R)-2,3-Butanediol | C <sub>4</sub> H <sub>10</sub> O <sub>2</sub> | -                    | 118.84 | -      | 114.67  | 36.42          | -      | -      | -      | -               | 179.98 | -      | -       | 261.42 |
| 11         | 6.934  | N-Hexanol            | C <sub>6</sub> H <sub>14</sub> O              | -                    | 50.09  | -      | 45.70   | 65.18          | -      | -      | 68.36  | 60.12           | 45.62  | -      | 420.32  | -      |
| 12         | 10.67  | 1-Heptanol           | C <sub>7</sub> H <sub>16</sub> O              | -                    | -      | -      | 40.83   | -              | -      | -      | 44.66  | -               | -      | -      | 107.17  | -      |
| 13         | 11.031 | oct-1-en-3-ol        | C <sub>8</sub> H <sub>16</sub> O              | 63.28                | 142.24 | 63.28  | 51.38   | 42.21          |        | 63.28  | 315.35 | 261.24          | -      | 63.28  | 1042.23 | -      |
| 14         | 13.683 | 2-Ethyl-1-hexanol    | C <sub>8</sub> H <sub>18</sub> O              | 83.68                | -      | 83.68  | -       | -              | 94.88  | 83.68  | -      | -               | 42.26  | 83.68  | -       | -      |
| 15         | 16.032 | 1-Octyl alcohol      | C <sub>8</sub> H <sub>18</sub> O              | 53.89                | 21.85  | 53.89  | -       | -              | 57.06  | 53.89  | -      | -               | -      | 53.89  | -       | -      |



| Number | RT     | Name                     | Molecular formula                             | The absolute content |        |        |        |                |        |        |        |                 |        |        |         |        |
|--------|--------|--------------------------|-----------------------------------------------|----------------------|--------|--------|--------|----------------|--------|--------|--------|-----------------|--------|--------|---------|--------|
|        |        |                          |                                               | Refrigeration        |        | Frozen |        | Micro-freezing |        |        |        | Ice temperature |        |        |         |        |
|        |        |                          |                                               | 0 d                  | 6 d    | 0 d    | 6 d    | 12 d           | 18 d   | 0 d    | 6 d    | 12 d            | 18 d   | 0 d    | 6 d     | 12 d   |
| 16     | 17.221 | 4-Methyldecane-5-ol      | C <sub>11</sub> H <sub>24</sub> O             | -                    | -      | -      | -      | -              | -      | -      | 35.87  | 64.71           | -      | -      | -       | -      |
| 17     | 17.466 | 2-Butyl-1-octanol        | C <sub>12</sub> H <sub>26</sub> O             | -                    | 18.44  | -      | -      | -              | -      | -      | -      | -               | -      | -      | 19.52   | -      |
| 18     | 18.119 | Phenethyl alcohol        | C <sub>8</sub> H <sub>10</sub> O              | -                    | 76.68  | -      | -      | -              | -      | -      | -      | -               | -      | -      | -       | 100.12 |
| Total  |        | Alcohol                  |                                               | 200.85               | 830.16 | 200.85 | 252.58 | 143.81         | 151.94 | 200.85 | 464.23 | 743.34          | 267.86 | 200.85 | 1589.24 | 361.54 |
| 19     | 16.032 | Octyl Formate            | C <sub>9</sub> H <sub>18</sub> O <sub>2</sub> | -                    | -      | -      | 32.45  | -              | -      | -      | 79.5   | 21.63           | -      | -      | 145.59  | -      |
| Total  |        | Esters                   |                                               | 0.00                 | 0.00   | 0.00   | 32.45  | 0.00           | 0.00   | 0.00   | 79.5   | 21.63           | 0.00   | 0.00   | 145.59  | 0.00   |
| 20     | 15.041 | 2,6-dimethylnonane       | C <sub>11</sub> H <sub>24</sub>               | -                    | 27.61  | -      | 36.10  | -              | 157.45 | -      | 50.34  | -               | 71.61  | -      | 26.28   | -      |
| 21     | 15.041 | 2,4-dimethyldecane       | C <sub>12</sub> H <sub>26</sub>               | -                    | -      | -      | -      | -              | 57.8   | -      | -      | -               | 17.82  | -      | -       | -      |
| 22     | 16.912 | 1-Undecene               | C <sub>11</sub> H <sub>22</sub>               | -                    | -      | -      | -      | 261.42         | -      | -      | -      | 171.48          | -      | -      | -       | -      |
| 23     | 17.478 | 4,5-Dimethylnonane       | C <sub>11</sub> H <sub>24</sub>               | -                    | -      | -      | -      | -              | 67.37  | -      | -      | -               | -      | -      | -       | -      |
| 24     | 25.585 | 4-Ethylundecanol         | C <sub>13</sub> H <sub>28</sub>               | -                    | -      | -      | 22.11  | -              | -      | -      | 20.73  | -               | -      | -      | -       | -      |
| 25     | 26.372 | 4,6-Dimethyldodecane     | C <sub>14</sub> H <sub>30</sub>               | -                    | -      | -      | -      | -              | 92.18  | -      | -      | -               | 38.07  | -      | 40.86   | -      |
| 26     | 26.378 | 2,6,11-Trimethyldodecane | C <sub>15</sub> H <sub>32</sub>               | -                    | -      | -      | 36.69  | -              | -      | -      | 45.57  | -               | 13.96  | -      | 12.10   | -      |
| 27     | 27.439 | N-Tridecane              | C <sub>13</sub> H <sub>28</sub>               | -                    | -      | -      | -      | -              | -      | -      | -      | -               | -      | -      | 33.26   | -      |
| 28     | 31.711 | Tetradecane              | C <sub>14</sub> H <sub>30</sub>               | -                    | 24.84  | -      | 36.53  | 36.49          | 71.46  | -      | 46.12  | 28.44           | 17.46  | -      | 45.14   | 67.54  |

| Numb<br>er | RT         | Name            | Molecul<br>ar<br>formula                      | The absolute content |             |            |             |            |             |            |             |                |            |            |             |                 |  |  |  |
|------------|------------|-----------------|-----------------------------------------------|----------------------|-------------|------------|-------------|------------|-------------|------------|-------------|----------------|------------|------------|-------------|-----------------|--|--|--|
|            |            |                 |                                               | Refrigeration        |             |            |             | Frozen     |             |            |             | Micro-freezing |            |            |             | Ice temperature |  |  |  |
|            |            |                 |                                               | 0 d                  | 6 d         | 0 d        | 6 d         | 12 d       | 18 d        | 0 d        | 6 d         | 12 d           | 18 d       | 0 d        | 6 d         | 12 d            |  |  |  |
| 29         | 33.61<br>7 | Nonadecane      | C <sub>19</sub> H <sub>40</sub>               | -                    | -           | -          | 18.63       | 19.07      | -           | -          | 21.97       | -              | -          | -          | 14.72       | -               |  |  |  |
| 30         | 34.64<br>3 | N-pentadecane   | C <sub>15</sub> H <sub>32</sub>               | 40.39                | 33.63       | 40.39      | 55.4        | 37.62      | 73.74       | 40.39      | 68.09       | 19.33          | 17.39      | 40.39      | 44.51       | 81.91           |  |  |  |
| 31         | 37.02<br>1 | Hexadecane      | C <sub>16</sub> H <sub>34</sub>               | -                    | 18.52       | -          | 21.1        | -          | -           | -          | 30.68       | -              | -          | -          | 16.21       | 41.82           |  |  |  |
| Total      |            | Hydrocarbon     |                                               | 40.39                | 104.61      | 40.39      | 226.56      | 354.6      | 520.01      | 40.39      | 283.49      | 219.25         | 176.3<br>1 | 40.39      | 233.08      | 191.26          |  |  |  |
| 32         | 6.398      | Isovaleric acid | C <sub>5</sub> H <sub>10</sub> O <sub>2</sub> | -                    | 34.2        | -          | -           | -          | -           | -          | -           | -              | -          | -          | -           | 109.43          |  |  |  |
| Total      |            | Acid            | -                                             | 0.00                 | 34.2        | 0.00       | 0.00        | 0.00       | 0.00        | 0.00       | 0.00        | 0.00           | 0.00       | 0.00       | 0.00        | 109.43          |  |  |  |
| Total      |            | -               | -                                             | 677.3<br>0           | 1768.2<br>5 | 677.3<br>0 | 1649.3<br>7 | 937.4<br>8 | 1726.5<br>2 | 677.3<br>0 | 2233.2<br>4 | 2602.6<br>0    | 835.5<br>6 | 677.3<br>0 | 4282.2<br>2 | 1037.6<br>7     |  |  |  |

**Supplementary Table S7. OAV of volatile flavor compounds in beef under different low-temperature storage methods.**

| The threshold value | Name               | Refrigeration |        | Frozen |       |       |       | Micro-freezing |        |        |       | Ice temperature |         |       |
|---------------------|--------------------|---------------|--------|--------|-------|-------|-------|----------------|--------|--------|-------|-----------------|---------|-------|
|                     |                    | 0 d           | 6 d    | 0 d    | 6 d   | 12 d  | 18 d  | 0 d            | 6 d    | 12 d   | 18 d  | 0 d             | 6 d     | 12 d  |
| 7.5                 | Hexanal            | 20.69         | -      | 20.69  | 69.72 | 5.36  | 23.93 | 20.69          | 63.76  | 37.25  | 18.01 | 20.69           | 89.11   | 0.00  |
| 5                   | Heptaldehyde       | 8.15          | 2.52   | 8.15   | 18.03 | 2.62  | 11.07 | 8.15           | 13.42  | 15.49  | 0.00  | 8.15            | 18.05   | 0.00  |
| 50                  | Benzaldehyde       | -             | 1.62   | -      | 2.36  | 3.37  | 8.41  | -              | 4.44   | 8.31   | 1.78  | -               | 3.19    | 2.99  |
| 4                   | Phenylacetaldehyde | 0.00          | 20.96  | 0.00   | 20.57 | 6.48  | 0.00  | 0.00           | 5.84   | 9.52   | 24.37 | 0.00            | 0.00    | 11.21 |
| 3.5                 | Nonyl aldehyde     | 31.24         | 15.72  | 31.24  | 61.21 | 21.27 | 97.56 | 31.24          | 58.47  | 46.74  | 19.99 | 31.24           | 68.72   | 34.13 |
| 70                  | 2-Heptanone        | -             | 0.32   | -      | 0.23  | 0.49  | 0.00  | -              | 0.75   | 0.00   | 0.00  | -               | 1.38    | 0.00  |
| 25                  | 2-Nonanone         | -             | -      | -      | 0.84  | 1.61  | 0.00  | -              | 0.00   | 1.04   | 0.00  | -               | 0.00    | 0.00  |
| 100                 | Isoamyl alcohol    | 0.00          | 4.02   | 0.00   | 0.00  | 0.00  | 0.00  | 0.00           | 0.00   | 3.57   | 0.00  | 0.00            | 0.00    | 0.00  |
| 200                 | 1-Hexanol          | 0.00          | 0.25   | 0.00   | 0.23  | 0.33  | 0.00  | 0.00           | 0.34   | 0.30   | 0.23  | 0.00            | 2.10    | 0.00  |
| 1                   | 1-Octen-3-ol       | -             | 142.24 | -      | 51.38 | 42.21 | 0.00  | -              | 315.35 | 261.24 | 0.00  | -               | 1042.23 | 0.00  |
| 54                  | Octanol            | 1.00          | 0.40   | 1.00   | 0.00  | 0.00  | 1.06  | 1.00           | 0.00   | 0.00   | 0.00  | 1.00            | 0.00    | 0.00  |
| 45                  | Phenethyl alcohol  | 0.00          | 1.70   | 0.00   | 0.00  | 0.00  | 0.00  | 0.00           | 0.00   | 0.00   | 0.00  | 0.00            | 0.00    | 2.22  |
| 100                 | Isovaleric acid    | -             | 0.34   | -      | 0.00  | 0.00  | 0.00  | -              | 0.22   | 0.00   | 0.00  | -               | 0.00    | 1.09  |

**Supplementary Table S8. Principal component eigenvalues and cumulative contribution rate.**

| Principal components | Eigenvalue | Contribution % | Cumulative<br>contribution rate % |
|----------------------|------------|----------------|-----------------------------------|
| 1                    | 4.95       | 38.10          | 38.10                             |
| 2                    | 2.42       | 18.61          | 56.72                             |
| 3                    | 1.80       | 13.83          | 70.55                             |
| 4                    | 1.37       | 10.52          | 81.07                             |
